# Transforming Growth Factor- $\beta$ 1 Overproduction in Prostate Cancer: Effects on Growth *in Vivo* and *in Vitro*

Mitchell S. Steiner and Evelyn R. Barrack

Department of Urology  
Johns Hopkins University School of Medicine  
James Buchanan Brady Urological Institute  
Johns Hopkins Hospital  
Baltimore, Maryland 21205

We found previously that transforming growth factor- $\beta$ 1 (TGF $\beta$ 1) mRNA levels are markedly elevated in rat prostate cancer (Dunning R3327 sublines) compared to levels in normal prostate. Our goal was to determine whether elevated expression of TGF $\beta$ 1 is biologically relevant to prostate cancer growth *in vivo*. We chose as our model the R3327-MATLyLu prostate cancer epithelial cell line, which produces metastatic anaplastic tumors when reinoculated *in vivo*. Our approach was to stably transfect MATLyLu cells with an expression vector that codes for latent TGF $\beta$ 1 and to isolate subclones of cells that overexpressed TGF $\beta$ 1 mRNA. We also isolated a subclone of MATLyLu cells transfected with a control vector lacking the TGF $\beta$ 1 cDNA insert. We then studied the growth of these cells *in vivo* and *in vitro*. Twenty days after sc inoculation of  $10^6$  cells *in vivo*, TGF $\beta$ 1-overproducing MATLyLu tumors were 50% larger, markedly less necrotic, and produced more extensive metastatic disease (lung metastases in 73% of all lobes and lymph node metastases in 88% of animals) compared to control MATLyLu tumors (lung metastases, 21%; lymph node metastases, 7%). Thus, TGF $\beta$ 1 produced *in vivo* is biologically active and can promote prostate cancer growth, viability, and aggressiveness, perhaps via effects on the host and/or on the tumor cells themselves. When followed *in vitro*, TGF $\beta$ 1-overproducing cells became growth inhibited, but this effect was transient as cells subsequently resumed proliferating. Growth inhibition was due to TGF $\beta$ , because it could be prevented by TGF $\beta$ -neutralizing antibody. Therefore, prostate cancer cells can activate and respond to secreted latent TGF $\beta$ 1, and although the cells are transiently inhibited *in vitro*, there is no net inhibition of growth. The ability of the cells to respond to endogenously produced TGF $\beta$ 1 suggests that TGF $\beta$ 1 overexpression enhances tumor growth *in vivo* at least in part via an effect of TGF $\beta$ 1 on the

tumor cells themselves. (Molecular Endocrinology 6: 15–25, 1992)

## INTRODUCTION

Transforming growth factor- $\beta$ 1 (TGF $\beta$ 1), a 25-kilodalton (kDa) dimeric polypeptide, is widely referred to as a prototypical epithelial cell inhibitor (1, 2). Yet, TGF $\beta$ 1 expression in many cancers is higher than that in their normal tissue counterparts (3–9). For example, we recently reported that TGF $\beta$ 1 mRNA levels were dramatically elevated in rat prostate adenocarcinomas (Dunning R3327 sublines grown *in vivo*) compared to those in normal prostate and were higher the greater the degree of anaplasia and the faster the growth rate (3). This presents an apparent paradox if one views TGF $\beta$ 1 strictly as an epithelial inhibitor. However, TGF $\beta$ 1 also has potential tumor growth-promoting properties; for example, TGF $\beta$ 1 can stimulate angiogenesis (1, 2, 10), suppress the immune system (11, 12), and stimulate invasion and metastatic potential (13).

Speculation aside, elevated mRNA expression does not necessarily reflect the production of elevated levels of biologically active, secreted TGF $\beta$ 1 protein. TGF $\beta$ 1 is secreted by cells in an inactive latent form that does not bind to TGF $\beta$  receptors; latent TGF $\beta$ 1 must be activated to be biologically active (1, 2, 14, 15). Thus, although prostate tumors produce large amounts of TGF $\beta$ 1, this would be of no consequence if it remained in the latent form. There are indeed many tumor cell types that cannot activate latent TGF $\beta$ 1, that lack TGF $\beta$  receptors, or that are insensitive to TGF $\beta$ 1 (1, 14).

Our goal, therefore, was to determine whether elevated expression of TGF $\beta$ 1 was biologically relevant to prostate cancer growth *in vivo*. The approach we chose was to stably transfect TGF $\beta$ 1 cDNA (which codes for latent TGF $\beta$ 1) into prostate cancer cells and to isolate a subclone of cells that overexpress TGF $\beta$ 1 mRNA. These TGF $\beta$ 1-overproducing cells could be studied *in vitro* and also could be reinoculated *in vivo* to produce

sc tumors. The model we chose was the Dunning R3327-MATLyLu rat prostate adenocarcinoma subline, which is serially transplantable, anaplastic, and metastatic (16). An *in vitro* cell line of this tumor has been established, and cells passaged *in vitro* can be re inoculated *in vivo* to produce a tumor with properties like those of the original *in vivo* tumor (17).

The control nontransfected MATLyLu tumor already produces high levels of TGF $\beta$ 1 mRNA (3). We reasoned that if this TGF $\beta$ 1 had no effect on tumor growth, then engineered overexpression of even higher levels of TGF $\beta$ 1 would be of no consequence, and tumor behavior of TGF $\beta$ 1-overproducing transfected cells would be no different from that of control cells. On the other hand, if TGF $\beta$ 1 produced by prostate cancer cells affected tumor growth, then overexpression might enhance this effect. Thus, if TGF $\beta$ 1 were acting as a typical epithelial cell inhibitor, then TGF $\beta$ 1 overexpression should inhibit or slow tumor growth (compared to control tumors). In contrast, if TGF $\beta$ 1 was a positive modulator of prostate cancer, then TGF $\beta$ 1 overexpression should enhance tumor growth.

Our approach differs from that of other studies of the effects of TGF $\beta$ 1 on tumor epithelial cells. The effects of TGF $\beta$ 1 on prostate cancer epithelial cells have been reported previously (18–22), but those studies were carried out only *in vitro* and used activated TGF $\beta$ 1 that was added exogenously. To date, therefore, the role of endogenously produced TGF $\beta$ 1 in prostate cancer growth *in vivo* has not been documented. A unique aspect of our approach is that we are able to investigate the role of endogenously produced TGF $\beta$ 1 and study its effects on cells *in vivo* and *in vitro*.

We found that TGF $\beta$ 1-overproducing MATLyLu tumor cells produced significantly larger and less necrotic tumors *in vivo* and produced more extensive metastatic disease than did control MATLyLu cells. These dramatic effects indicate that endogenously produced TGF $\beta$ 1 is biologically active *in vivo* and can promote prostate cancer growth, viability, and aggressiveness. These data are the first to illustrate a net growth-promoting effect of TGF $\beta$ 1 on an epithelial tumor *in vivo*. Proliferative behavior *in vitro* indicated that the tumor cells themselves could activate secreted latent TGF $\beta$ 1 and respond, although the response was transient inhibition. These data illustrate the value of *in vivo* studies in demonstrating that TGF $\beta$ 1 is not acting as a prototypical epithelial cell growth inhibitor in prostate cancer.

## RESULTS

### TGF $\beta$ 1 Overexpression in MATLyLu Cells Transfected with TGF $\beta$ 1 cDNA

MATLyLu prostate cancer epithelial cells were cotransfected with the expression vectors pSVTGF $\beta$ 1 (which codes for latent TGF $\beta$ 1) and pZipneo (which confers G418 drug resistance). Long term growth of transfected

cells in medium containing G418 allowed selection of drug-resistant colonies that had stably integrated the pZipneo gene into the cellular genome. Stable integration also of the pSVTGF $\beta$ 1 vector was confirmed by probing a Southern DNA blot for the presence of specific plasmid sequences (data not shown). Stable integration of the murine TGF $\beta$ 1 cDNA, however, did not necessarily mean that the subclone was producing high levels of TGF $\beta$ 1. To identify subclones that produced high levels of TGF $\beta$ 1 mRNA, poly(A)<sup>+</sup> RNA was isolated from subclones that contained the murine TGF $\beta$ 1 insert and adjacent vector sequences, and TGF $\beta$ 1 mRNA levels were assayed by Northern blot analysis. Figure 1 (*right lane*) shows one subclone of cells transfected with the TGF $\beta$ 1 expression vector (referred to as pSVTGF $\beta$ 1, subclone 2B5) that produced markedly higher levels of TGF $\beta$ 1 mRNA than nontransfected MATLyLu cells (Fig. 1, *left lane*). Both cell lines, in contrast, expressed similar amounts of actin mRNA (Fig. 1). The transfection procedure itself did not affect TGF $\beta$ 1 expression, since MATLyLu cells transfected with the control vector pSG5, which lacks a TGF $\beta$ 1 insert (referred to as MATLyLu-pSG5 cells) produced TGF $\beta$ 1 mRNA levels similar to those produced by nontransfected cells (Fig. 1, compare *left and middle lanes*). mRNA transcripts of the transfected murine TGF $\beta$ 1

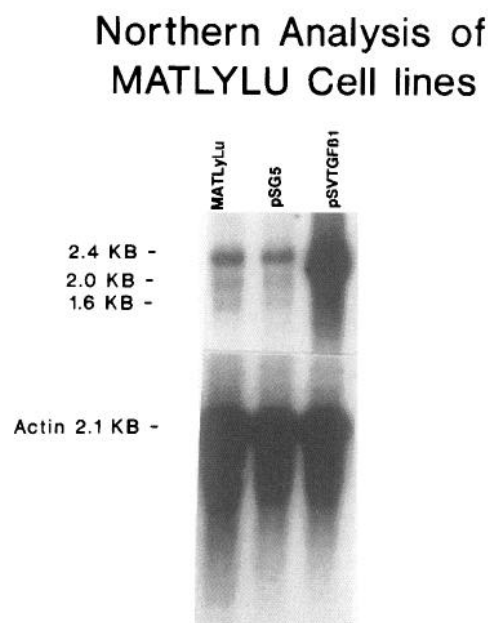

**Fig. 1.** Northern Analysis of MATLyLu Cell Lines

Poly(A)<sup>+</sup> mRNA was isolated from cell monolayers, electrophoresed in 1.7% agarose, transferred to nylon, and hybridized with a [<sup>32</sup>P]dCTP-labeled 1.6-kb murine TGF $\beta$ 1 cDNA probe. TGF $\beta$ 1 mRNA was markedly more abundant in MATLyLu-pSVTGF $\beta$ 1 cells (*right lane*) than in nontransfected MATLyLu cells (*left lane*) or MATLyLu-pSG5 cells transfected with a control vector lacking TGF $\beta$ 1 cDNA (*middle lane*). The same blot was stripped and rehybridized with an actin probe (*bottom panel*), indicating that equal amounts of mRNA were loaded per lane (5  $\mu$ g).

gene were 2.3 kilobases (kb) and could be distinguished from the predominant 2.4-kb transcript of the endogenous rat TGF $\beta$ 1 gene. However, because TGF $\beta$ 1 is virtually 100% conserved between mice and humans (23), it is likely that the effects of the product of transfected murine TGF $\beta$ 1 cDNA would be identical to those of the endogenous rat TGF $\beta$ 1 expressed by MATLyLu cells.

### TGF $\beta$ 1 Overexpression Promotes Tumor Growth *In Vivo*

We, thus, now had MATLyLu cell lines that differed in their level of TGF $\beta$ 1 mRNA expression. To determine whether this difference affected tumor cell behavior, we investigated tumor growth *in vivo*.

Nontransfected MATLyLu cells, control transfectants (MATLyLu-pSG5), and TGF $\beta$ 1-overproducing cells (MATLyLu-pSVTGF $\beta$ 1) were injected into the flanks of adult male rats, and tumor size was measured at frequent intervals (Fig. 2). For the first 8 days of growth *in vivo*, tumor volumes were not significantly different among the three groups. However, by 15 days, TGF $\beta$ 1-overproducing MATLyLu-pSVTGF $\beta$ 1 tumors were significantly larger ( $18.6 \pm 1.6$  cc;  $n = 18$ ) than control MATLyLu tumors ( $13.0 \pm 1.0$  cc;  $n = 16$ ) or MATLyLu-pSG5 tumors ( $11.5 \pm 1.1$  cc;  $n = 17$ ;  $P < 0.005$ ). Also at 17 and 20 days, TGF $\beta$ 1-overproducing tumors were 50% larger than either MATLyLu or MATLyLu-pSG5 tumors ( $P < 0.005$ ).

Animals were killed on day 20. Control tumors (Fig.

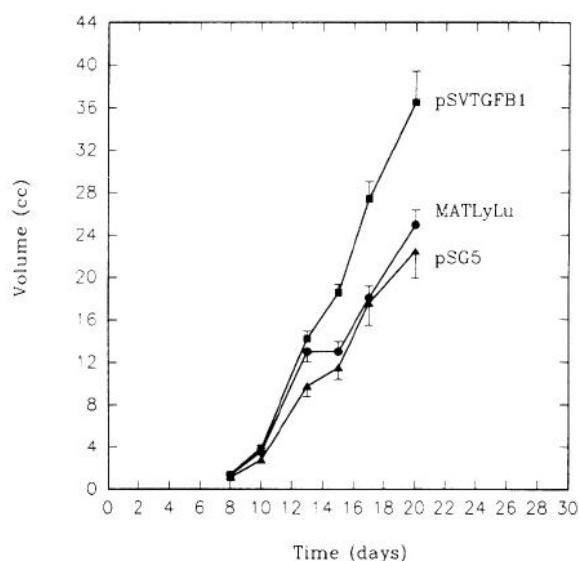

**Fig. 2.** *In Vivo* Growth of MATLyLu Tumor Sublines

Cell monolayers were washed in Hanks' buffer, trypsinized, and resuspended in Hanks' buffer. Tumor cells ( $1 \times 10^6$ ) were inoculated into the flanks of male Copenhagen rats on day 0. Tumors formed by MATLyLu (●), MATLyLu-pSG5 (▲), and MATLyLu-pSVTGF $\beta$ 1 (■) cells were measured in two dimensions by calipers. Tumor volumes and doubling times were calculated as previously described (3). Each point represents the mean  $\pm$  SEM volume of 16–20 tumors.

3A) had markedly more central necrosis than TGF $\beta$ 1-overproducing tumors (Fig. 3B). Only a thin external rim of viable tumor was evident in control MATLyLu tumors (Fig. 3A), whereas the bulk of each MATLyLu-pSVTGF $\beta$ 1 tumor was viable (Fig. 3B). Therefore, although the volume of MATLyLu-pSVTGF $\beta$ 1 tumors was 1.5 times that of control tumors, the amount of viable tissue was probably much more than 1.5 times greater. Northern RNA analysis confirmed that the MATLyLu-pSVTGF $\beta$ 1 tumors were expressing much higher levels of TGF $\beta$ 1 mRNA than were control MATLyLu tumors (Fig. 4).

These data provide compelling evidence that TGF $\beta$ 1 overexpression indeed affects MATLyLu tumor behavior. These are the first data that illustrate a net growth-promoting effect of TGF $\beta$ 1 on an epithelial tumor *in vivo*.

### TGF $\beta$ 1-Overproducing Tumors Have a Higher Metastatic Rate

When rats were killed on day 20, control rats with MATLyLu or MATLyLu-pSG5 tumors had visible lung

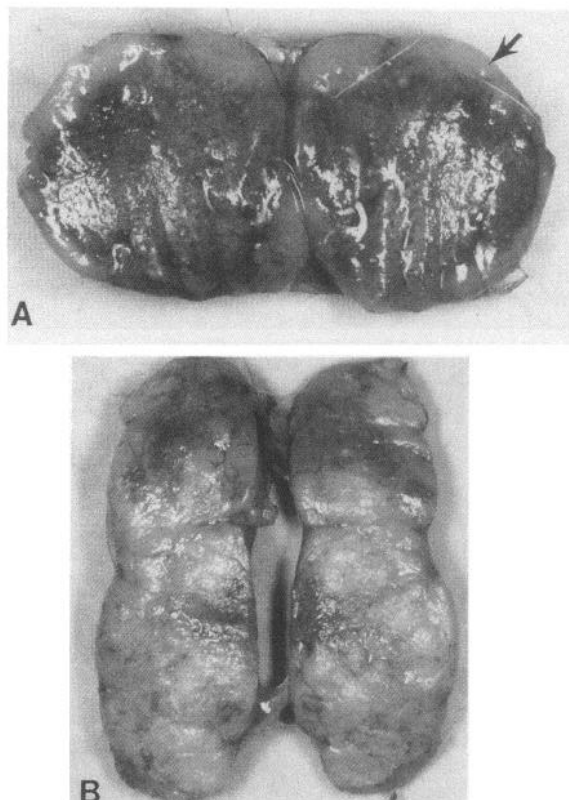

**Fig. 3.** Macroscopic Cross-Section of MATLyLu (A) and TGF $\beta$ 1-Overproducing MATLyLu-pSVTGF $\beta$ 1 (B) Tumors

Twenty days postinoculation, animals were killed, and tumors were bisected and inspected for central necrosis. This figure compares a 12.6-cc MATLyLu tumor (A) and a 23.8-cc MATLyLu-pSVTGF $\beta$ 1 tumor (B). Control MATLyLu tumors had markedly more central necrosis, and only a peripheral rim of viable tissue (arrow). In contrast, TGF $\beta$ 1-overproducing MATLyLu-pSVTGF $\beta$ 1 tumors had very little necrosis, and the bulk of the tumor appeared viable.

## Northern analysis of MATLyLu tumor sublines

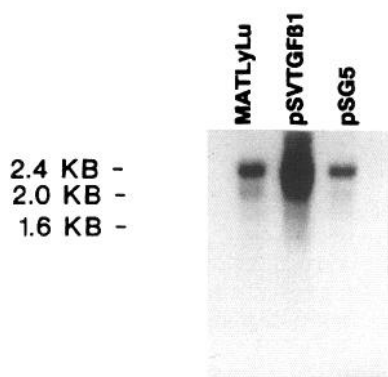

**Fig. 4.** Northern Analysis of MATLyLu Tumor Sublines

Poly(A)<sup>+</sup> mRNA was isolated from the MATLyLu tumor sublines, electrophoresed, transferred to nylon, and hybridized with TGFβ1 cDNA. TGFβ1 mRNA transcripts were much more abundant in MATLyLu-pSVTGFβ1 tumors (*middle lane*) than in control nontransfected MATLyLu tumors (*left lane*) or MATLyLu-pSG5 tumors (*right lane*). This confirms that the MATLyLu-pSVTGFβ1 tumors growing *in vivo* were still overproducing high levels of TGFβ1.

**Table 1.** Quantitation of Metastatic Disease in Tumor-Bearing Animals

| Tumor Subline <sup>a</sup> | Primary Tumor Vol (cc) | Lung Metastases (% of lobes) <sup>b</sup> | Lymph Node Metastases (% of animals) <sup>c</sup> |
|----------------------------|------------------------|-------------------------------------------|---------------------------------------------------|
| MATLyLu                    | 25.0 ± 1.4             | 26 ± 14                                   | 14                                                |
| MATLyLu-pSG5               | 22.4 ± 2.5             | 17 ± 3                                    | 0                                                 |
| MATLyLu-pSVTGFβ1           | 36.5 ± 2.9             | 73 ± 12                                   | 88                                                |

<sup>a</sup> Cells (10<sup>6</sup>) of each subline were injected sc in the flank. Twenty days later, animals were killed, primary tumor volume was measured, and visible metastases were quantitated, as described in *Materials and Methods*.

<sup>b</sup> The percentage of all five lung lobes that contained one or more visible metastases was determined for each rat; the mean percentage (±SEM) for the number of animals in each group is shown.

<sup>c</sup> Gross lymph node metastases were found in one of seven animals with MATLyLu tumors (nontransfected), none of seven with MATLyLu-pSG5 tumors (control transfectants), and seven of eight animals with TGFβ1-overproducing tumors (pSVTGFβ1 transfectants).

metastases in 26% or 17% of all lung lobes, respectively. In striking contrast, MATLyLu-pSVTGFβ1 tumor-bearing animals had lung metastases in 73% of all lung lobes. Lymph node metastases were found in 14% or 0% of animals with control tumors, whereas 88% of animals with TGFβ1-overproducing tumors had lymph node metastases (Table 1).

According to previous studies, virtually all animals with control MATLyLu tumors eventually develop lymph node and lung metastases (16, 17). It is apparent,

therefore, that we terminated our experiment before metastases were visibly apparent in all animals. However, by doing so, we were able to detect a dramatically higher rate of metastasis in TGFβ1-overproducing tumor-bearing animals. If we had waited until all control tumors had metastasized, we probably would have missed seeing this effect of TGFβ1. These data further support a role of TGFβ1 overexpression in enhancing MATLyLu tumor growth.

A second subclone of TGFβ1-overproducing MATLyLu-pSVTGFβ1 cells, subclone 1C6, was isolated which produced TGFβ1 mRNA levels similar to those in subclone 2B5 (see Fig. 1, *right lane*). Like subclone 2B5, subclone 1C6 also produced tumors that were significantly larger and more aggressive (produced metastases sooner) than control MATLyLu transfected with the pSG5 vector that lacks TGFβ1 cDNA. The similar behavior of two independent subclones of TGFβ1-overproducing MATLyLu-pSVTGFβ1 transfectants confirms that enhanced tumor growth and aggressiveness were, in fact, due to TGFβ1 overexpression, rather than to the transfection procedure itself.

### Prostate Cancer Cells Can Activate and Respond to Secreted Latent TGFβ1

The mechanism by which TGFβ1 overexpression enhanced MATLyLu tumor growth *in vivo* may have involved effects of TGFβ1 on the tumor cells themselves and/or effects of TGFβ1 on the host. To investigate whether endogenously produced TGFβ1 had direct effects on prostate cancer cells, we studied the *in vitro* proliferative behavior of control and TGFβ1-overproducing cells in monolayer culture.

TGFβ1 is secreted in a latent form and must be activated in order to elicit a cellular response. We wished to address two questions. 1) Do prostate cancer cells activate latent TGFβ1? 2) Is their growth rate affected by TGFβ1? Because we wished to study the effect of TGFβ1 produced by the cells themselves, our experimental strategy was to grow the cells in serum-free medium and not to change the medium during the course of the experiment. We used serum-free medium to avoid the confounding effects of other serum growth factors on cell proliferation and to avoid the binding of secreted TGFβ1 to serum proteins. The medium was not changed, so that TGFβ1 secreted by the cells could accumulate to a concentration high enough to affect the cells, if they were capable of responding. If the cells in culture were not able to activate latent TGFβ1, we wished to determine whether they could, nevertheless, respond to activated TGFβ1. Therefore, to activate latent TGFβ1 secreted by the cells, conditioned medium was removed, heated to 90 C for 5 min (24), and, after cooling to 37 C, reintroduced to the cultures. Thus, cell proliferation in heat-activated medium was compared to that in unheated medium.

Nontransfected MATLyLu cells and control transfected MATLyLu-pSG5 cells had identical growth properties (Fig. 5). For both cell lines, cell proliferation was

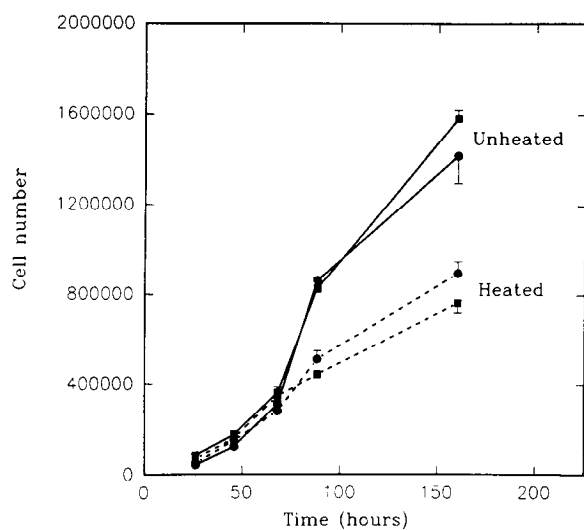

**Fig. 5.** *In Vitro* Growth of Nontransfected and Control Transfected Cell Lines

Nontransfected MATLyLu cells (●) and control transfected MATLyLu-pSG5 cells (■; *i.e.* cells transfected with control vector lacking TGF $\beta$ 1 cDNA) were grown in unheated medium (solid lines) or in heat-activated medium (dotted lines). Cells were grown as monolayers on plastic in serum-free medium, and the medium was not changed over the course of the experiment. Each point represents the mean  $\pm$  SEM number of cells in triplicate T-25 cell culture flasks. Heat-activated medium was prepared by heating conditioned medium at 90 C for 5 min to activate all secreted latent TGF $\beta$ 1. Medium was then cooled to 37 C and reintroduced into the original T-25 flasks. Heating was repeated at each time point.

slower in heat-activated medium than in unheated medium. By 88 h, cell number in heat-activated conditioned medium was only 50% of that in unheated medium (Fig. 5). Thus, MATLyLu and MATLyLu-pSG5 cells became growth inhibited by a heat-activated factor secreted into the medium. That growth was not affected by heat-activated medium at early time points suggests that the concentration of secreted factor had not yet reached an inhibitory level. Although this secreted factor presumably was TGF $\beta$ 1, we did not rule out the possibility that growth inhibition may have been due to heat inactivation of growth stimulatory secreted factors.

In unheated medium, cell proliferation was exponential for the first 88 h, but then slowed [cell number plotted on arithmetic scale in Fig. 5 (solid lines) and on log scale in Fig. 6A (solid line)]. Because cell proliferation was also slowed by growth in heat-activated medium (Fig. 5), it is tempting to speculate that the slowing of proliferation in unheated medium may have been due to cell-mediated activation of this secreted factor (latent TGF $\beta$ 1), rather than to nutrient depletion.

TGF $\beta$ 1 overexpression had dramatic effects on growth *in vitro* (Fig. 6). In unheated medium, the proliferation rates of TGF $\beta$ 1-overproducing MATLyLu-pSVTGF $\beta$ 1 cells and nontransfected MATLyLu cells were similar until 46 h, after which the proliferation rate of MATLyLu-pSVTGF $\beta$ 1 cells slowed dramatically (Fig.

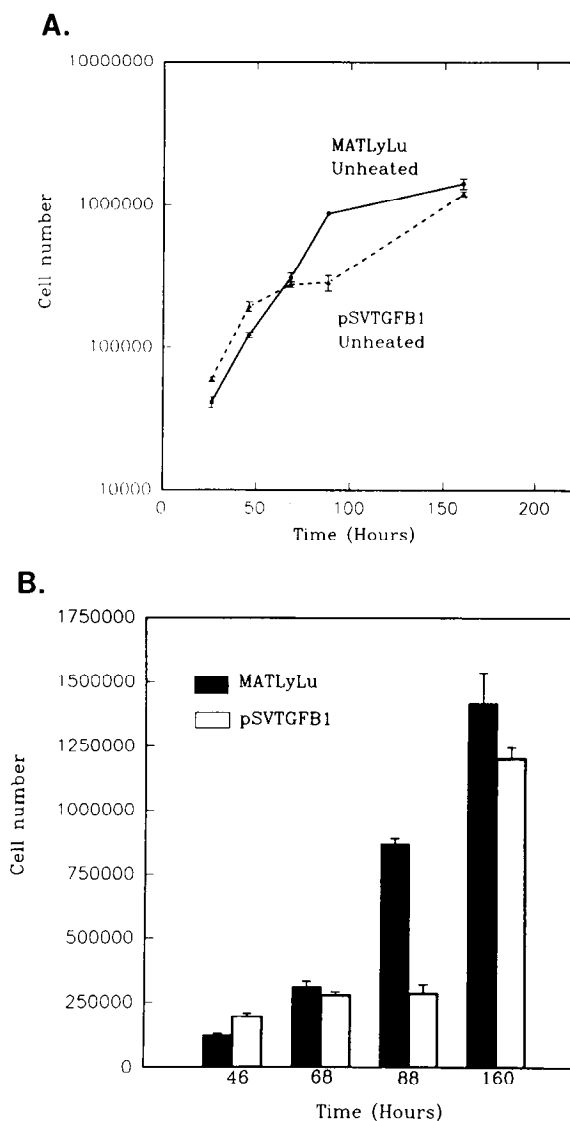

**Fig. 6.** *In Vitro* Growth of TGF $\beta$ 1-Overproducing MATLyLu-pSVTGF $\beta$ 1 Cells in Unheated Medium

Transfected TGF $\beta$ 1-overproducing MATLyLu-pSVTGF $\beta$ 1 cells were grown in unheated medium (dashed line). Nontransfected MATLyLu cells (solid line) are shown for comparison. The experimental design was exactly as described in Fig. 5. In A, cell number is plotted on a log scale to illustrate exponential growth rates. In B, cell number at selected time points is plotted on a linear scale to aid comparison between the cell lines.

6A). Between 46 and 88 h, the number of TGF $\beta$ 1-overproducing cells increased only 1.47-fold, while the number of nontransfected MATLyLu cells increased 7-fold (Fig. 6B). Because TGF $\beta$ 1-overexpressing cells became inhibited relative to nontransfected cells, we inferred that this effect was due to TGF $\beta$ 1, and because this effect occurred in unheated medium, we inferred that the transfected cells themselves were able to activate latent TGF $\beta$ 1. The inhibition was transient, however, as MATLyLu-pSVTGF $\beta$ 1 cells resumed proliferating after 88 h; by 160 h, the total cell number was



similar to that of nontransfected MATLyLu cells (Fig. 6).

These data illustrate important features of our experimental design. Only by counting cell number at multiple time points were we able to detect this complex growth pattern of TGF $\beta$ 1-overproducing MATLyLu-pSVTGF $\beta$ 1 cells. Had we measured cell number only on day 1, 2, or 7 we would have concluded that TGF $\beta$ 1 overexpression had no effect on MATLyLu prostate cancer cell growth *in vitro*. If we had measured cell number on day 3 or 4 we would have observed growth inhibition, but we would have missed the transient nature of this effect. In addition, by allowing secreted factors to accumulate in the medium, we may infer that a threshold concentration must be reached before cell proliferation is affected. Had we changed the medium at frequent intervals, the concentration of this secreted inhibitor would not have reached this critical level.

When the conditioned medium of TGF $\beta$ 1-overproducing MATLyLu-pSVTGF $\beta$ 1 cells was heated to activate the entire secreted pool of latent TGF $\beta$ 1, proliferation was immediately and completely inhibited (Fig. 7), presumably the result of a high concentration of secreted TGF $\beta$ 1. However, this growth inhibition was transient; after 46 h, MATLyLu-pSVTGF $\beta$ 1 cells grown in heat-activated medium resumed proliferating. Even with increasing concentrations of TGF $\beta$ 1 accumulating over time in culture and repeated heating of the medium to activate all secreted latent TGF $\beta$ 1, MATLyLu-pSVTGF $\beta$ 1 cell proliferation was not reinhibited.

Thus, whether cells were grown in unheated or heat-activated conditioned medium, TGF $\beta$ 1-overproducing cells became growth inhibited relative to nontransfected or control transfected (pSG5) cells. This suggests that inhibition was indeed due to TGF $\beta$ 1, rather than to

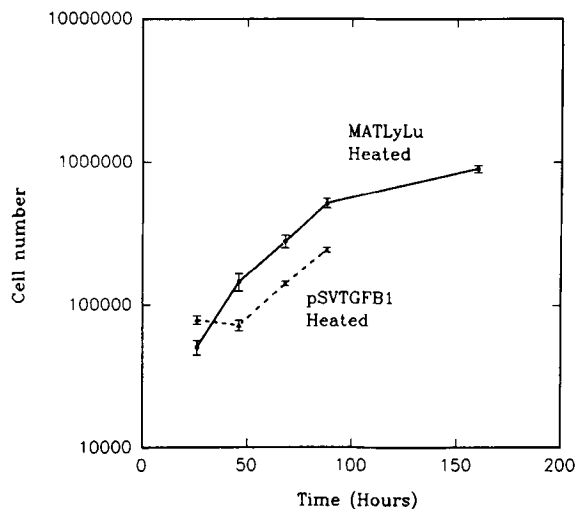

**Fig. 7.** Growth of TGF $\beta$ 1-Overproducing MATLyLu-pSVTGF $\beta$ 1 Cells in Heat-Activated Medium

TGF $\beta$ 1-overproducing MATLyLu-pSVTGF $\beta$ 1 cells (dashed line) were grown in heat-activated medium, as described in Fig. 5. Nontransfected MATLyLu cells (solid line) are shown for comparison. Note the log scale on the y-axis.

inactivation of growth stimulatory secreted factors. Cells grown in heat-activated medium became inhibited sooner, probably because the concentration of activated TGF $\beta$ 1 on day 1 was higher in heated medium than in unheated medium. Over time, the concentration of active TGF $\beta$ 1 in unheated medium became high enough to inhibit growth.

### TGF $\beta$ Antibody Neutralizes the Effect of TGF $\beta$ 1 Overexpression

In the experiments described above, we attributed the transient *in vitro* growth inhibition of TGF $\beta$ 1-overproducing transfected MATLyLu cells to TGF $\beta$ 1 expression, secretion, and activation. To confirm that the effect was indeed due to TGF $\beta$ 1, we investigated the effect of TGF $\beta$ -neutralizing antibody on growth (Table 2). This antibody specifically inhibits the binding of TGF $\beta$  to its receptors (R & D Systems, Inc., Minneapolis, MN) (14, 15). TGF $\beta$ 1-overproducing MATLyLu-pSVTGF $\beta$ 1 cells were initially growth inhibited and subsequently resumed proliferating, with a 24-h doubling time (Table 2). In contrast, when TGF $\beta$ 1-overproducing cells were plated in the presence of TGF $\beta$ -neutralizing antibody, proliferation was not inhibited, and cells grew. These data confirm that growth inhibition was mediated by TGF $\beta$  secreted into the medium. In addition, because the antibody binds only to active TGF $\beta$  and not to latent TGF $\beta$  (14, 15), the ability of the TGF $\beta$  antibody to prevent growth inhibition of MATLyLu-pSVTGF $\beta$ 1 cells in unheated medium (Table 2) supports our conclusion that the cells are able to activate the TGF $\beta$  that they secrete.

### DISCUSSION

Prostate cancers express supranormal levels of TGF $\beta$ 1 mRNA (3), as do many other tumor types (4–9), but until now the relevance of this has been unclear and untested. Using transfected MATLyLu prostate cancer cells, we had the unique opportunity to investigate the

**Table 2.** Effect of TGF $\beta$ 1-Neutralizing Antibody on Growth of TGF $\beta$ 1-Overproducing MATLyLu Cells

| Addition | Interval (h) |       |
|----------|--------------|-------|
|          | 6–18         | 18–66 |
| None     | No growth    | 24    |
| Ab       | 11           | 26    |

TGF $\beta$ 1-overproducing MATLyLu-pSVTGF $\beta$ 1 cells were grown in unheated serum-free medium in 24-well cell culture plates (1 ml/well). TGF $\beta$ -neutralizing antibody (Ab) was added at the time of subculture (10  $\mu$ g/ml) and at each subsequent time point (an additional 5  $\mu$ g/ml) to neutralize any newly produced activated TGF $\beta$ 1. Values shown are doubling times (hours), calculated from semilog plots of cell number vs. time, as shown in Fig. 6A.

effects of TGF $\beta$ 1 overexpression *in vivo*. TGF $\beta$ 1 overexpression in prostate cancer cells *in vivo* had dramatic tumor growth-promoting effects. Compared to controls, TGF $\beta$ 1-overproducing tumors were significantly larger and less necrotic, and metastatic disease was more extensive. Therefore, TGF $\beta$ 1 produced *in vivo* is biologically active and can promote prostate cancer growth, viability, and aggressiveness, perhaps via effects on the host and/or on the tumor cells themselves.

The mechanism by which TGF $\beta$ 1 overexpression enhances MATLyLu tumor size is not known; however, TGF $\beta$ 1 has several properties, reported in other systems, that may account at least in part for this effect. For example, TGF $\beta$ 1 is a potent stimulator of angiogenesis (new blood vessel growth) *in vivo* (10, 25). Because tumor size is limited by its blood supply (26), MATLyLu tumors expressing higher levels of TGF $\beta$ 1 may have higher angiogenesis activity, which might allow tumors to grow to a larger size. Such tumors might also be expected to exhibit less necrosis. TGF $\beta$ 1 also is a potent suppressor of the immune system (11, 12), and TGF $\beta$ 1 overexpression in a highly immunogenic murine fibrosarcoma allows it to escape immune surveillance (12).

TGF $\beta$ 1 has a plethora of effects on the extracellular matrix (1, 2). TGF $\beta$ 1 can promote its formation and inhibit its degradation (1, 2). It is not clear how these effects, if they occurred in MATLyLu tumors, would confer a growth advantage on TGF $\beta$ 1-overexpressing tumors, unless an increase in extracellular matrix components provides additional substratum on which cells can continue to proliferate. On the other hand, TGF $\beta$ 1 also has effects on extracellular matrix that could decrease cell adhesion to or enhance degradation of extracellular matrix components (1, 2); such effects could enhance tumor aggressiveness by facilitating the ability of tumors to metastasize. Thus, TGF $\beta$ 1 1) stimulates collagenase and heparanase activities in some cell types (13, 27); 2) stimulates production of tenascin (28), a protein component of the extracellular matrix that antagonizes the adhesion of cells to fibronectin (29); and 3) modulates the expression of integrins, cell adhesion molecules that are receptors for extracellular matrix components (30). In MG-63 human osteosarcoma cells, TGF $\beta$ 1 changed the adhesive phenotype by modifying the expression of integrins (30); this change caused the selective loss of cell adhesion to the basement membrane protein laminin (30). It is interesting in this regard to note that TGF $\beta$ 1 decreases the adherence of metastatic R3327-AT3 rat prostate cancer cells to tissue culture plastic under certain conditions (19). Thus, decreased cell adhesion to or enhanced degradation of extracellular matrix components might facilitate the ability of TGF $\beta$ 1-overproducing MATLyLu tumors to metastasize. The angiogenic activity of TGF $\beta$ 1 might then allow metastatic cells to grow after reaching their destination. This might be reflected biologically by more extensive metastatic disease.

Although TGF $\beta$ 1 is widely referred to as an inhibitor of epithelial cell proliferation (1, 2, 31), there are excep-

tions to this generalization. For example, TGF $\beta$ 1 stimulates *in vitro* proliferation of normal and virus-transformed human neonatal prostate epithelial cells (21) and some cell lines of colon carcinoma (32), melanoma (33), and tracheal cancer (34). TGF $\beta$ 1 stimulates the production of basic fibroblast growth factor (35, 36), platelet-derived growth factor (PDGF) (37–39), insulin-like growth factor-I (40), and PDGF receptors (41, 42). The mitogenic effect of TGF $\beta$ 1 on fibroblasts and smooth muscle cells has been attributed to the stimulated expression of PDGF A-chain (37, 38) or PDGF receptor  $\alpha$ -subunit (42). Thus, *in vivo*, TGF $\beta$ 1 produced by epithelial tumor cells could potentially up-regulate growth factor production in the tumor cells (autocrine mechanism) and/or in adjacent nonmalignant supporting stromal cells. Growth factors produced by stromal cells in response to TGF $\beta$ 1 might, in turn, stimulate tumor cell proliferation (paracrine mechanism).

It is not known whether the tumor growth-enhancing effect of TGF $\beta$ 1 overexpression *in vivo* is due to the effects of TGF $\beta$ 1 on the host and/or on the tumor cells. However, because TGF $\beta$ 1-overproducing MATLyLu cells can activate and respond to secreted latent TGF $\beta$ 1 *in vitro*, it is reasonable to suspect that effects of TGF $\beta$ 1 on the tumor cells may account at least in part for effects on the tumor as a whole. Yet, the response *in vitro* was growth inhibition, albeit transient inhibition. Interestingly, proliferation of human prostate cancer cell lines PC3 and DU145 *in vitro* is also inhibited by exogenously added TGF $\beta$ 1, and over time, these cells resume proliferating at control rates despite retreatment with TGF $\beta$ 1 (18). Thus, despite continued exposure to TGF $\beta$ 1, prostate cancer cells lose sensitivity to its inhibitory effect; perhaps this occurs via down-regulation of TGF $\beta$  receptors, uncoupling of TGF $\beta$  receptors from their signal transduction pathway, or stimulation of growth factors that overcome the growth inhibition. Although the mechanism by which cells escape inhibition is unknown, the transient nature of the inhibition, in both rat and human prostate cancer cells, suggests that TGF $\beta$ 1 does not have a net growth inhibitory effect on prostate cancer cell proliferation and, as such, is consistent with our *in vivo* data.

The apparent discrepancy between the effects of TGF $\beta$ 1 *in vivo* and *in vitro* is not surprising in light of other reports that also document growth inhibitory effects of TGF $\beta$ 1 on cells cultured on plastic vs. stimulatory effects *in vivo* (10, 43–45). For example, TGF $\beta$ 1 inhibits keratinocyte and endothelial cell proliferation *in vitro*, but *in vivo*, it stimulates epidermal growth (43, 45) and angiogenesis (10, 43, 44). TGF $\beta$ 1 also inhibits hepatocyte proliferation *in vitro*, but *in vivo*, the inhibitory effect is transient, and repeated administration of TGF $\beta$ 1 at frequent intervals fails to suppress liver regeneration (46). In addition, there are numerous other examples of cells that do not behave *in vitro* as they do *in vivo*, perhaps reflecting the absence *in vitro* of stromal-epithelial interactions, epithelial cell polarity, or other factors (47–49).

In contrast, when endothelial cells are cultured in

three-dimensional collagen gels instead of on plastic, TGF $\beta$ 1 does not inhibit proliferation; rather, it stimulates cell migration and behavior similar to the angiogenic response *in vivo* (44). In skin explant cultures (where basement membrane-epidermal interactions remain undisturbed), TGF $\beta$ 1 stimulates growth by stimulating keratinocyte migration from the explant; DNA synthesis is unaffected (45). TGF $\beta$ 1 inhibits the growth of normal mammary epithelial cells cultured on plastic (39, 50), but not of cells cultured in a collagen gel matrix (50). Therefore, keratinocytes, endothelial cells, and mammary epithelial cells, which prototypically illustrate the growth inhibitory effect of TGF $\beta$ 1 on epithelial cells, are growth inhibited when cultured on plastic, but not when cultured with extracellular matrix components (44, 45, 50). Similarly, Sertoli cells (48) and uterine epithelial cells (49) cultured on basement membrane Matrigel respond to hormones as they do *in vivo*, whereas these cells on plastic do not respond. Thus, it is not surprising that we have observed different effects of TGF $\beta$ 1 overexpression *in vivo* and on plastic *in vitro*. Importantly, all of these examples illustrate that growth inhibitory effects of TGF $\beta$ 1 on cells cultured on plastic may not be predictive of similar effects *in vivo*. However, by studying the *in vivo* behavior of transfected TGF $\beta$ 1-overproducing prostate cancer cells, we have been able to demonstrate that TGF $\beta$ 1 is not acting as a prototypical epithelial cell inhibitor in prostate cancer. In addition, by studying *in vitro* behavior, we may infer that the tumor growth-enhancing effect of TGF $\beta$ 1 *in vivo* may occur at least in part via effects on the tumor cells themselves.

## MATERIALS AND METHODS

### Cell Culture

The MATLyLu prostate adenocarcinoma cell line was used between passages 128–140; it was originally derived from the Dunning R3327-MATLyLu tumor subline, which is serially transplantable *in vivo*. The properties of the MATLyLu tumor *in vivo* and *in vitro* have been well characterized (16, 17). *In vivo*, MATLyLu cells form a tumor that is poorly differentiated, androgen independent, rapidly growing (1.7-day doubling time), and highly metastatic to lymph nodes and lungs. Cells passaged *in vitro* can be reinoculated *in vivo* to produce a tumor with properties like those of the original *in vivo* tumor (16, 17). For tissue culture, cells were maintained and passaged in serum-containing medium (RPMI-1640 medium containing 10% fetal bovine serum plus 250 nm dexamethasone) and kept at 37 C in a humidified atmosphere of 5% carbon dioxide and 95% air (17). Cell lines were negative for mycoplasma. For experiments in which cells were grown in serum-free medium, cell monolayers were washed in Hanks' Balanced Salt Solution, trypsinized (5 min; 37 C), and subcultured into serum-free medium [Ham's F-12 medium with 1X Nutridoma HU (Boehringer Mannheim, Indianapolis, IN) plus 250 nm dexamethasone]. Cell number was quantitated using a Coulter counter (Hialeah, FL). RPMI-1640 medium, Ham's F-12 medium, fetal bovine serum, and Hanks' Balanced Salt Solution without calcium and magnesium were purchased from Gibco (Grand Island, NY). TGF $\beta$  neutralizing antibody was obtained from R & D Systems.

### Plasmids

The expression vector pSVTGF $\beta$ 1 contains a full-length murine TGF $\beta$ 1 cDNA down-stream of a simian virus-40 (SV40) early promoter (to promote efficient transcription) and up-stream of portions of rabbit  $\beta$ -globin exons 2 and 3 (which do not get translated) and rabbit  $\beta$ -globin polyadenylation signal (12). This plasmid was kindly provided by Dr. R. Daniel Beauchamp, University of Texas Medical Branch. Cells transfected with this vector express high levels of latent TGF $\beta$ 1 protein (12). The TGF $\beta$ 1 cDNA fragment (1.6 kb) could be excised from the vector with *EcoR*I and used to probe cellular RNA or DNA blots for the presence of TGF $\beta$ 1 mRNA transcripts or TGF $\beta$ 1 cDNA, respectively. A control vector, pSG5, which contains the SV40 promoter, rabbit globin gene, and rabbit polyadenylation signal was purchased from Stratagene (La Jolla, CA). A third plasmid [pZipneo SV (x)] (51) encoded the gene for resistance to the antibiotic G418 (Geneticin, an aminoglycoside).

### Transfection and Selection of TGF $\beta$ 1 Subclones

Cells transfected with pZipneo become resistant to cell killing by G418. Stable integration of pZipneo into the host genome allows continued proliferation of cells in medium containing G418 (selection medium). MATLyLu cells (passage 128) were cotransfected with the pZipneo plasmid and either the pSVTGF $\beta$ 1 plasmid or the pSG5 plasmid, using Lipofectin reagent and the protocol described by the manufacturer (Bethesda Research Laboratories, Gaithersburg, MD). These treated cultures were maintained for 7 weeks in serum-containing medium with 500  $\mu$ g/ml G418 (Geneticin, Gibco, Grand Island, NY). This concentration is in excess of what is needed to kill all cells that do not contain the pZipneo gene. After this 7-week selection interval, G418-resistant colonies represent clones of cells that have stably integrated the transfected neomycin resistance gene into their genome. Not all colonies that contain pZipneo will also contain the plasmid pSVTGF $\beta$ 1; thus, further screening is necessary. To select colonies that also have integrated the transfected TGF $\beta$ 1 murine cDNA, randomly chosen G418-resistant colonies were screened for the presence of pSVTGF $\beta$ 1 plasmid DNA [a 527-basepair (bp) *EcoR*I/*Xho*I fragment] by Southern DNA analysis and for overexpression of mRNA transcripts by Northern RNA analysis. We identified and isolated a subclone, designated MATLyLu-pSVTGF $\beta$ 1, which produced high levels of TGF $\beta$ 1 mRNA. G418-resistant cells that had stably integrated the pSG5 control vector (lacking the TGF $\beta$ 1 cDNA insert) were detected by probing cellular DNA with a 1.2-kb *Sa*I fragment of the pSG5 plasmid by Southern DNA analysis; this subclone is designated MATLyLu-pSG5.

### Southern DNA Analysis

DNA was isolated from  $1 \times 10^8$  cells, as described previously (52). Purified DNA samples were digested with specific restriction endonucleases at 37 C for 3 h. DNA from MATLyLu-pSG5 was digested with *Sa*I (to probe for the presence of the 1.2-kb *Sa*I fragment of the pSG5 plasmid), and DNA from MATLyLu-pSVTGF $\beta$ 1 was digested with *EcoR*I and *Xho*I (to probe for the presence of the 1.6-kb *EcoR*I TGF $\beta$ 1 cDNA and the 527-bp *EcoR*I/*Xho*I fragment of pSVTGF $\beta$ 1 plasmid). DNA was electrophoresed in 0.8% agarose gels, denatured with sodium hydroxide (52), and transferred onto Nytran (Schleicher and Schuell, Inc., Keene, NH) overnight at room temperature in  $10 \times$  SSC ( $1 \times$  SSC is 0.15 M NaCl, 0.015 M Na citrate, pH 7), using the manufacturer's standard protocol. The DNA was baked onto the Nytran at 80 C for 1 h. The membrane was prehybridized for 2 h at 42 C with 50  $\mu$ g/ml salmon sperm DNA in  $6 \times$  SSPE ( $1 \times$  SSPE is 0.15 M NaCl, 10 mM Na $_2$ PO $_4$ , 1 mM EDTA) plus  $10 \times$  Denhardt's solution ( $1 \times$  Denhardt contains ficoll 400, polyvinylpyrrolidone, and bovine serum



albumin, each at 0.02%) (Sigma, St. Louis, MO) plus 1% SDS. Hybridization with a specific  $^{32}\text{P}$ -labeled cDNA probe was carried out for 24 h at 68 C in  $6 \times \text{SSPE}$ , 1% sodium dodecyl sulfate (SDS), 50% formamide (pH 7.2), 50  $\mu\text{g}/\text{ml}$  salmon sperm DNA, and 10% dextran sulfate. The cDNA probes (the 1.2-kb *Sa*I fragment of the pSG5 plasmid, and the 1.6-kb *Eco*R1 fragment and 527-bp *Eco*R1/*Xho*I fragment of the pSVTGF $\beta$ 1 plasmid) were labeled with deoxycytidine 5' [ $\alpha$ - $^{32}\text{P}$ ] triphosphate (3000 Ci/mmol; Amersham, Arlington Heights, IL) using the Multiprime DNA labeling kit (Amersham International, Amersham, Aylesbury, Buckinghamshire, United Kingdom) based on the method described by Feinberg and Vogelstein (53). After hybridization, the blots were washed as follows: twice in  $6 \times \text{SSPE}$ -0.1% SDS at room temperature, twice in  $1 \times \text{SSPE}$ -0.1% SDS at 37 C, and once in  $0.1 \times \text{SSPE}$ -0.1% SDS at 65 C. The nylon blot was heat-sealed into a plastic bag and placed onto Kodak XAR-5 film (Eastman Kodak, Rochester, NY) at  $-70$  C for 24–48 h.

### RNA Extraction

Total RNA was extracted from either  $1 \times 10^8$  cells or 1 g tumor tissue using a modification of the lithium chloride-urea method (54). Tumor tissue was pulverized in liquid nitrogen and homogenized in 3 M LiCl plus 6 M urea (10 ml/g tissue) at 4 C (30 sec; twice) using a Polytron (Brinkmann, Luzern, Switzerland). Cultured cells were washed with 10 vol Tris-buffered saline (1 M NaCl and 20 mM Tris, pH 7.5) and homogenized in 2 ml 3 M LiCl plus 6 M urea. Homogenates were incubated at 4 C overnight, then centrifuged (SW27 rotor; 25,000 rpm; 30 min). Pellets were resuspended (2 ml/g tissue) in buffer III [10 mM Tris-HCl (pH 7.4), 1 mM EDTA, and 0.1% SDS], and  $3 \times \text{FEB}$  [150 mM Tris-HCl (pH 9.0), 3 mM EDTA, and 1.5% SDS] was added (1 ml/g tissue). After gentle mixing, FEB-saturated hot phenol (56 C) was added (2 ml/g tissue) and mixed continuously for 5–10 min. After centrifugation (5,000 rpm; Sorvall HS4 rotor, Norwalk, CT; 30 min; 4 C), the aqueous layer was transferred to a sterile tube, chloroform-isoamyl alcohol (49:1) was added (3 ml/g tissue), and the material was mixed continuously for 5 min and recentrifuged (5,000 rpm; 15 min; 4 C). The aqueous layer was removed, and 0.1 vol 3 M sodium acetate, pH 5.2, plus 2 vol absolute ethanol were added. The RNA was precipitated by cooling for 3 h at  $-70$  C or overnight at  $-20$  C, followed by centrifugation (5,000 rpm; 30 min; 4 C). The pellet was dried under a vacuum and redissolved in 1 ml elution buffer (10 mM Tris-HCl, pH 7.4, and 1 mM EDTA).

### Messenger RNA Purification

Poly(A) $^+$  RNA was purified from total RNA using a modification of methods described previously (52) and the spin column method described by Pharmacia (Piscataway, NJ). Total RNA (1 mg in 1 ml elution buffer) was heated at 65 C, placed on ice, mixed gently with 0.2 ml sample buffer [10 mM Tris-HCl (pH 7.4), 1 mM EDTA, and 3.0 M NaCl], applied to an oligo(dT)-cellulose column (Boehringer Mannheim, Indianapolis, IN), and allowed to seep into the column under gravity. High salt buffer [10 mM Tris-HCl (pH 7.4), 1 mM EDTA, and 0.5 M NaCl] was applied to the column, and the column was centrifuged at 1375 rpm for 2 min at room temperature in a tabletop centrifuge. The high salt buffer step was repeated, and high salt eluates were discarded. The column was washed three times with low salt buffer (10 mM Tris-HCl (pH 7.4), 1 mM EDTA, and 0.1 M NaCl), centrifuging the column, as described above, after each successive wash; wash eluates were discarded. Poly(A) $^+$  RNA was eluted off the column by applying four successive aliquots of prewarmed elution buffer (65 C) and centrifuging the column (1375 rpm; 2 min) after each application. The combined eluate was reheated, 0.2 ml sample buffer was added, and the mixture was reapplied to the oligo(dT)-cellulose column; all subsequent steps were repeated as described above. The final poly(A) $^+$  RNA eluate was transferred

to a sterile tube and precipitated by the addition of 0.1 vol sample buffer, 0.01 vol glycogen (10 mg/ml) as a coprecipitant, and 2.5 vol cold absolute ethanol. After cooling at  $-20$  C overnight, the sample was centrifuged at 5000 rpm for 30 min at 4 C. The poly(A) $^+$  RNA precipitate was dissolved in elution buffer and stored at  $-70$  C. The concentration of RNA was determined spectrophotometrically.

### Northern RNA Analysis

Poly(A) $^+$  RNA was electrophoresed in a 1.7% agarose gel containing 2.2 M formaldehyde (55), then transferred overnight onto nylon (Nytran, Schleicher and Schuell) in the presence of  $10 \times \text{SSC}$  buffer. Blots were washed ( $5 \times \text{SSC}$  buffer; 5 min), air dried, baked (80 C; 1 h), prehybridized (68 C; 1 h; in  $5 \times \text{SSC}$ ,  $5 \times \text{Denhardt's}$  solution, 100  $\mu\text{g}/\text{ml}$  yeast transfer RNA, and 0.1% SDS), and then hybridized at 68 C overnight in prehybridization solution containing  $1 \times 10^6$  cpm/ml  $^{32}\text{P}$ -labeled cDNA. Blots were washed twice with  $1 \times \text{SSC}$  and 0.1% SDS (22 C; 15 min), and twice with  $0.25 \times \text{SSC}$  and 0.1% SDS (68 C; 30 min), then placed onto Kodak XAR-5 film at  $-70$  C for 1–7 days. Murine TGF $\beta$ 1 cDNA (1.6 kb) was excised from the pSVTGF $\beta$ 1 plasmid using *Eco*R1, purified by electrophoresis in agarose, and labeled with [ $^{32}\text{P}$ ]dCTP using the Multiprime DNA labeling kit (Amersham).

### Tumor Transplantation

Before inoculating cultured cells into animals, cells grown in serum-containing medium were washed with Hanks' buffer, and trypsinized for 5 min at 37 C. Cells were collected in Hanks' buffer and centrifuged at 1000 rpm for 10 min. The cells were resuspended in Hanks' buffer at a concentration of  $1 \times 10^6$  cells/0.3 ml. Adult male Copenhagen rats (300 g BW; 60 days old; from Harlan Sprague-Dawley, Indianapolis, IN) were anesthetized with Metofane (methoxyflurane, Pitman-Moore, Washington Crossing, NJ), and 0.3 ml cell suspension was injected sc into each flank. Tumor size was measured in two dimensions using calipers, and tumor volume was calculated according to the formula: volume =  $0.5 (\text{length} + \text{width}) \times \text{length} \times \text{width} \times 0.5236$  (16).

### Quantitation of Metastatic Disease

Metastatic disease was quantitated macroscopically. Lung metastases were surveyed in each of the five anatomical lobes: right upper, right middle, right lower, left upper, and left lower. The presence of metastasis in a single lobe was designated as 20% involvement. Retroperitoneal and axillary lymph nodes were evaluated for the presence or absence of metastasis.

### Statistical Analysis

The statistical significance of differences between groups was analyzed using Student's *t* test. Data are presented as the mean  $\pm$  SEM.

### Acknowledgments

We are grateful to Dr. R. Daniel Beauchamp, University of Texas Medical Branch, for supplying us with the expression vector pSVTGF $\beta$ 1. We thank Dr. William B. Isaacs for helpful discussions, Dalal Tonb for excellent technical assistance, and Ruth Middleton for editorial help.

Received July 10, 1991. Revision received October 17, 1991. Accepted October 17, 1991.

Address requests for reprints to: Dr. Evelyn R. Barrack, Johns Hopkins Hospital, 115 Marburg Building, 600 North Wolfe Street, Baltimore, Maryland 21205.

This work was supported by NCI Grant CA-16924 and NIDDK Urology Research Training Grant 5T-32-DK-07552.

## REFERENCES

- Massague J 1990 The transforming growth factor- $\beta$  family. *Annu Rev Cell Biol* 6:597-641
- Barnard JA, Lyons RM, Moses HL 1990 The cell biology of transforming growth factor  $\beta$ . *Biochim Biophys Acta* 1032:79-87
- Steiner MS, Barrack ER 1990 Expression of transforming growth factors and epidermal growth factor in normal and malignant rat prostate. *J Urol* 143:240A
- Derynck R, Goeddel DV, Ullrich A, Gutterman JU, Williams RD, Bringman TS, Berger WH 1987 Synthesis of messenger RNAs for transforming growth factors  $\alpha$  and  $\beta$  and the epidermal growth factor receptor by human tumors. *Cancer Res* 47:707-712
- Anzano MA, Roberts AB, De Larco JE, Wakefield LM, Assoian RK, Roche NS, Smith JM, Lazarus JE, Sporn MB 1985 Increased secretion of type  $\beta$  transforming growth factor accompanies viral transformation of cells. *Mol Cell Biol* 5:242-247
- Niitsu Y, Urushizaki Y, Koshida Y, Terui K, Mahara K, Kohgo Y, Urushizaki I 1988 Expression of TGF-beta gene in adult T cell leukemia. *Blood* 71:263-266
- Gomella LG, Sargent ER, Wade TP, Anglard P, Linehan WM, Kasid A 1989 Expression of transforming growth factor  $\alpha$  in normal human adult kidney and enhanced expression of transforming growth factors  $\alpha$  and  $\beta$  in renal cell carcinoma. *Cancer Res* 49:6972-6975
- Barrett-Lee P, Travers M, Luqmani Y, Coombes RC 1990 Transcripts for transforming growth factors in human breast cancer: clinical correlates. *Br J Cancer* 61:612-617
- Braun L, Gruppuso P, Mikumo R, Fausto N 1990 Transforming growth factor  $\beta$ 1 in liver carcinogenesis: messenger RNA expression and growth effects. *Cell Growth Differen* 1:103-111
- Yang EY, Moses HL 1990 Transforming growth factor  $\beta$ 1-induced changes on cell migration, proliferation, and angiogenesis in the chicken chorioallantoic membrane. *J Cell Biol* 111:731-741
- Kehrl JH, Wakefield LM, Roberts AB, Jakowlew S, Alvarez-Mon M, Derynck R, Sporn MB, Fauci AS 1986 Production of transforming growth factor beta by human T lymphocytes and its potential role in the regulation of T cell growth. *J Exp Med* 163:1037-1050
- Torre-Amione G, Beauchamp RD, Koeppen H, Park BH, Schreiber H, Moses HL, Rowley DA 1990 A highly immunogenic tumor transfected with a murine transforming growth factor type  $\beta$ 1 cDNA escapes immune surveillance. *Proc Natl Acad Sci USA* 87:1486-1490
- Weich DR, Fabra A, Nakajima M 1990 Transforming growth factor  $\beta$  stimulates mammary adenocarcinoma cell invasion and metastatic potential. *Proc Natl Acad Sci USA* 87:7678-7682
- Wakefield LM, Smith DM, Masui T, Harris CC, Sporn MB 1987 Distribution and modulation of cellular receptors for transforming growth factor-beta. *J Cell Biol* 105:965-975
- Dennis PA, Rifkin DB 1991 Cellular activation of latent transforming growth factor  $\beta$  requires binding to the cation-independent mannose 6-phosphate/insulin-like growth factor type II receptor. *Proc Natl Acad Sci USA* 88:580-584
- Isaacs JT, Yu GW, Coffey DS 1981 The characterization of a newly identified, highly metastatic variety of Dunning R3327 rat prostatic adenocarcinoma system: the MATLyLu tumor. *Invest Urol* 19:20-23
- Isaacs JT, Isaacs WB, Feitz WFJ, Scheres J 1986 Establishment and characterization of seven Dunning rat prostate cancer cell lines and their use in developing methods for predicting metastatic abilities of prostatic cancer. *Prostate* 9:261-281
- Wilding G, Zugmeier G, Knabbe C, Flanders K, Gelmann E 1989 Differential effects of transforming growth factor  $\beta$  on human prostate cancer cells *in vitro*. *Mol Cell Endocrinol* 62:79-87
- Matuo Y, Nishi N, Takasuka H, Masuda Y, Nishikawa K, Isaacs JT, Adams PS, McKeehan WL, Sato GH 1990 Production and significance of TGF- $\beta$  in AT-3 metastatic cell line established from the Dunning rat prostatic adenocarcinoma. *Biochem Biophys Res Commun* 166:840-847
- McKeehan WL, Adams PS 1988 Heparin-binding growth factor/prostatropin attenuates inhibition of rat prostate tumor epithelial cell growth by transforming growth factor type beta. *In Vitro Cell Dev Biol* 24:243-246
- Kaighn ME, Reddel RR, Lechner JF, Peehl DM, Camalier RF, Brash DE, Saffiotti U, Harris CC 1989 Transformation of human neonatal prostate epithelial cells by strontium phosphate transfection with a plasmid containing SV40 early region genes. *Cancer Res* 49:3050-3056
- Shain SA, Lin AL, Koger JD, Karaganis AG 1990 Rat prostate cancer cells contain functional receptors for transforming growth factor- $\beta$ . *Endocrinology* 126:818-825
- Derynck R, Jarrett JA, Chen EY, Goeddel DV 1986 The murine transforming growth factor- $\beta$  precursors. *J Biol Chem* 261:4377-4379
- Kim I-C, Schomberg DW 1989 The production of transforming growth factor- $\beta$  activity by rat granulosa cell cultures. *Endocrinology* 124:1345-1351
- Roberts AB, Sporn MB, Assoian RK, Smith JM, Roche NS, Wakefield LM, Heine UI, Liotta LA, Falanga V, Kehrl JH, Fauci AS 1986 Transforming growth factor type  $\beta$ : rapid induction of fibrosis and angiogenesis *in vivo* and stimulation of collagen formation *in vitro*. *Proc Natl Acad Sci USA* 83:4167-4171
- Folkman J 1990 What is the evidence that tumors are angiogenesis dependent? *J Natl Cancer Inst* 82:4-6
- Chua CC, Geiman DE, Keller GH, Ladda RL 1985 Induction of collagenase secretion in human fibroblast cultures by growth promoting factors. *J Biol Chem* 260:5213-5216
- Pearson CA, Pearson D, Shibahara S, Hofsteenge J, Chiquet-Ehrismann R 1988 Tenascin: cDNA cloning and induction by TGF- $\beta$ . *EMBO J* 7:2977-2982
- Chiquet-Ehrismann R, Kalla P, Pearson CA, Beck K, Chiquet M 1988 Tenascin interferes with fibronectin action. *Cell* 53:383-390
- Heino J, Massague J 1989 Transforming growth factor- $\beta$  switches the pattern of integrins expressed in MG-63 human osteosarcoma cells and causes a selective loss of cell adhesion to laminin. *J Biol Chem* 264:21806-21811
- Moses HL, Yang EY, Pietenpol JA 1990 TGF- $\beta$  stimulation and inhibition of cell proliferation: new mechanistic insights. *Cell* 63:245-247
- Schroy P, Rifkin J, Coffey RJ, Winawer S, Friedman E 1990 Role of transforming growth factor  $\beta$ 1 in induction of colon carcinoma differentiation by hexamethylene bisacetamide. *Cancer Res* 50:261-265
- Mooradian DL, Purchio AF, Furcht LT 1990 Differential effects of transforming growth factor  $\beta$ 1 on the growth of poorly and highly metastatic murine melanoma cells. *Cancer Res* 50:273-277
- Jetten AM, Shirley JE, Stoner G 1986 Regulation of proliferation and differentiation of respiratory tract epithelial cells by TGF $\beta$ . *Exp Cell Res* 167:539-549
- Cook PW, Coffey Jr RJ, Magun BE, Pittelkow MR, Shipley GD 1990 Expression and regulation of mRNA coding for acidic and basic fibroblast growth factor and transforming growth factor  $\alpha$  in cells derived from human skin. *Mol Endocrinol* 4:1377-1385
- Story MT, Molter MA, Lawson RK, Influence of polypep-

- tide growth factors on basic fibroblast growth factor levels in human prostate-derived fibroblast cell cultures. 72nd Annual Meeting of The Endocrine Society, Atlanta GA, 1990, p 79 (Abstract)
37. Majack RA, Majesky MW, Goodman LV 1990 Role of PDGF-A expression in the control of vascular smooth muscle cell growth by transforming growth factor- $\beta$ . *J Cell Biol* 111:239–247
  38. Battegay EJ, Raines EW, Seifert RA, Bowen-Pope DF, Ross R 1990 TGF- $\beta$  induces bimodal proliferation of connective tissue cells via complex control of an autocrine PDGF loop. *Cell* 63:515–524
  39. Bronzert DA, Bates SE, Sheridan JP, Lindsey R, Valverius EM, Stampfer MR, Lippman ME, Dickson RB 1990 Transforming growth factor- $\beta$  induces platelet-derived growth factor (PDGF) messenger RNA and PDGF secretion while inhibiting growth in normal human mammary epithelial cells. *Mol Endocrinol* 4:981–989
  40. Elford PR, Lamberts SWJ 1990 Contrasting modulation by transforming growth factor- $\beta$ -1 of insulin-like growth factor-I production in osteoblasts and chondrocytes. *Endocrinology* 127:1635–1639
  41. Gronwald RGK, Seifert RA, Bowen-Pope DF 1989 Differential regulation of expression of two platelet-derived growth factor receptor subunits by transforming growth factor- $\beta$ . *J Biol Chem* 264:8120–8125
  42. Ishikawa O, LeRoy EC, Trojanowska M 1990 Mitogenic effect of transforming growth factor  $\beta$ 1 on human fibroblasts involves the induction of platelet-derived growth factor  $\alpha$  receptors. *J Cell Physiol* 145:181–186
  43. Sporn MB, Roberts AB 1990 TGF- $\beta$ : problems and prospects. *Cell Regul* 1:875–882
  44. Madri JA, Pratt BM, Tucker AM 1988 Phenotypic modulation of endothelial cells by transforming growth factor- $\beta$  depends upon the composition and organization of the extracellular matrix. *J Cell Biol* 106:1375–1384
  45. Hebda PA 1988 Stimulatory effects of transforming growth factor-beta and epidermal growth factor on epidermal cell outgrowth from porcine skin explant cultures. *J Invest Dermatol* 91:440–445
  46. Russell WE, Coffey Jr RJ, Ouellette AJ, Moses HL 1988 Type  $\beta$  transforming growth factor reversibly inhibits the early proliferative response to partial hepatectomy in the rat. *Proc Natl Acad Sci USA* 85:5126–5130
  47. Bissell MJ, Barcellos-Hoff MH 1987 The influence of extracellular matrix on gene expression: is structure the message? *J Cell Sci [Suppl]* 8:327–343
  48. Dym M, Lamsam-Casalotti S, Jia M-C, Kleinman HK, Papadopoulos V 1991 Basement membrane increases G-protein levels and follicle-stimulating hormone responsiveness of Sertoli cell adenylyl cyclase activity. *Endocrinology* 128:1167–1176
  49. Mani SK, Decker GL, Glasser SR 1991 Hormonal responsiveness by immature rabbit uterine epithelial cells polarized *in vitro*. *Endocrinology* 128:1563–1573
  50. Takahashi K, Suzuki K, Ono T 1990 Loss of growth inhibitory activity of TGF- $\beta$  toward normal human mammary epithelial cells grown within collagen gel matrix. *Biochem Biophys Res Commun* 173:1239–1247
  51. Treiger B, Isaacs J 1988 Expression of a transfected v-Harvey-ras oncogene in a Dunning rat prostate adenocarcinoma and the development of high metastatic ability. *J Urol* 140:1580–1586
  52. Sambrook J, Fritsch EF, Maniatis T 1989 Analysis and cloning of eukaryotic genome DNA. In: *Molecular Cloning—A Laboratory Manual*, ed 2. Cold Spring Harbor Laboratory, Cold Spring Harbor, pp 9.1–9.62
  53. Feinberg AP, Vogelstein B 1983 A technique for radiolabeling DNA restriction endonuclease fragments to high specific activity. *Anal Biochem* 132:6–13
  54. Auffray C, Rougeon F 1980 Purification of mouse immunoglobulin heavy-chain mRNAs from total myeloma tumor RNA. *Eur J Biochem* 107:303–314
  55. Seldin RF 1989 Analysis of RNA by Northern hybridization. In: Ausubel FM, Brent R, Kingston RE, Moore DD, Seidman JG, Smith JA, Struhl K (eds) *Current Protocols in Molecular Biology*. Greene and Wiley-Interscience, New York, vol 1:4.9.1–4.9.4

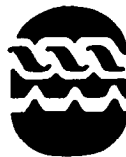

Source: http://academic.oup.com/mend/article-pdf/6/1/15/9078871/mend0015.pdf
